# Supplementary material for: Rheb1-Deficient Neutrophils Promote Hematopoietic Stem/Progenitor Cell Proliferation via Mesenchymal Stem Cells
Source: Front Cell Dev Biol. 2021 May 27;9:650599. doi: 10.3389/fcell.2021.650599 (PMC8191467; doi:10.3389/fcell.2021.650599)
Supplement: Supplementary file 2 [file Data_Sheet_1.DOCX]

**
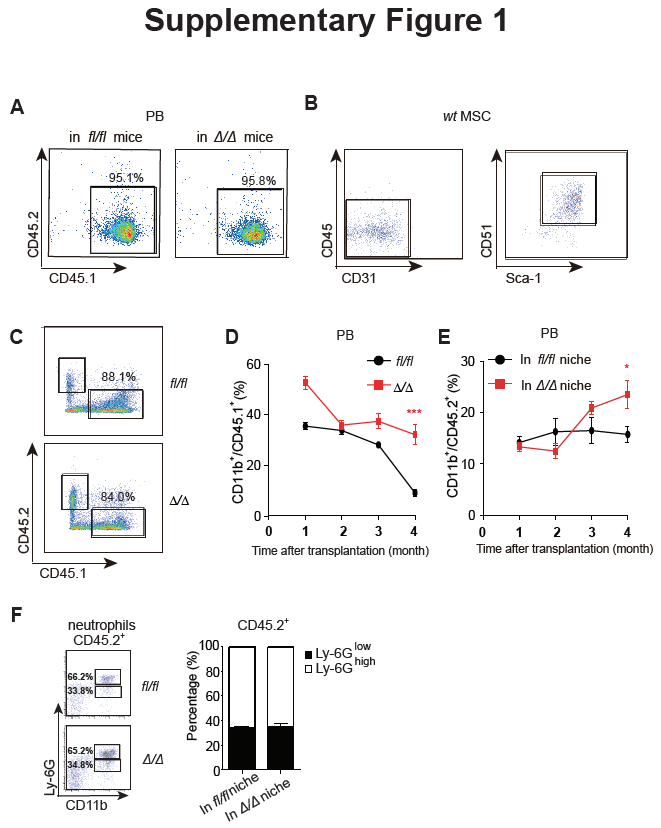
**

**Supplementary Figure 1. *WT* HSCs could be differentiated into normal neutrophils in the presence of *Rheb1Δ/Δ* blood cells in bone marrow.**

(A) The percentage of CD45.1+ cells in PB of *Rheb1fl/fl* and *Rheb1Δ/Δ* mice. (B) The surface markers of isolated MSCs from bone of mice. (C) The percentages of CD45.1+ cells and CD45.2+ cells in BM four months after transplantation. (D)The percentage of donor-derived CD11b+ cells (CD45.1+) in PB. (E) The percentage of donor-derived CD11b+ cells (CD45.2+) in PB. (F) The percentage of donor-derived CD11b+Ly-6Ghigh/low cells (CD45.2+) in BM four months after transplantation. The data are presented as the mean ± SD, n=3.

**
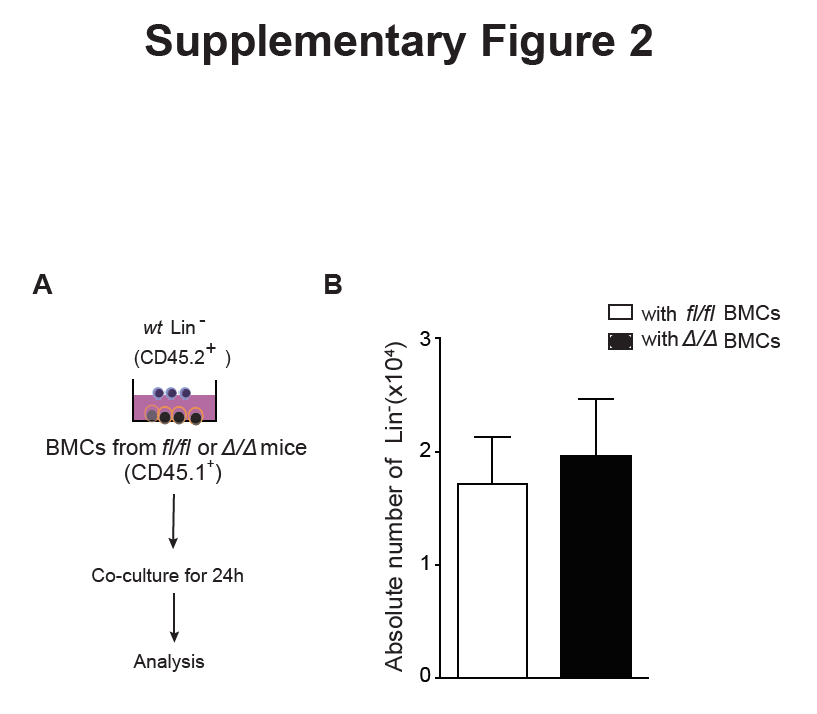
**

**Supplementary Figure 2. *Rheb1Δ/Δ* blood cells did not promote HSC proliferation *in vitro*.**

1. *WT* Lin- cells (CD45.2+) with BMCs from *Rheb1**fl/fl* and *Rheb1Δ/Δ* mice (CD45.1+) cocultured for 24 h. (B) The absolute number of Lin- cells after cocultured with either *Rheb1 fl/fl* or *Rheb1Δ/Δ* BMCs for 24 h. The data are presented as the mean ± SD, n=3.


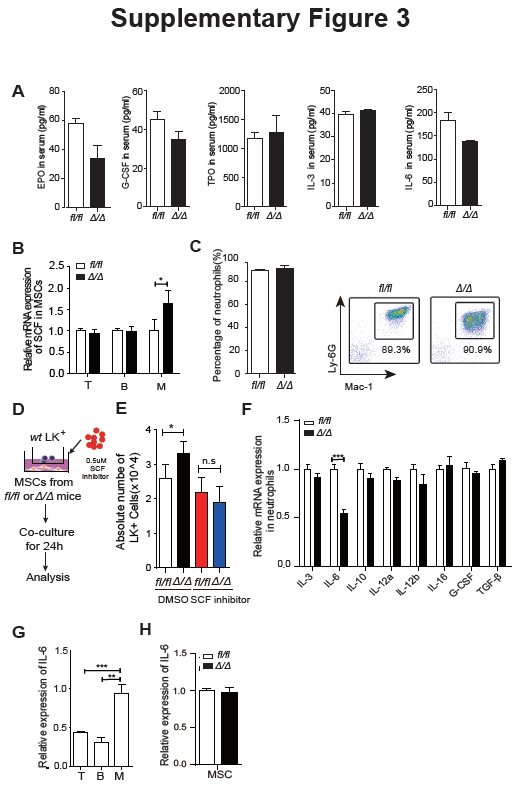


**Supplementary Figure 3. The expression of IL-6 and other cytokines in blood cells in *Rheb1fl/fl* or *Rheb1Δ/Δ* mice.**

(A) The protein level of EPO, G-SCF, TPO, IL-3 and IL-6 in the serum of *Rheb1fl/fl* and *Rheb1Δ/Δ* mice. (B) The relative mRNA expression of SCF in *wt* MSCs cocultured with *Rheb1fl/fl* or *Rheb1Δ/Δ* T cells, B cells and myeloid cells for 12 h. (C) Left panel, the percentage of isolated neutrophils from BM of *Rheb1fl/fl* and *Rheb1Δ/Δ* mice. Right panel, the surface markers of isolated neutrophils from BM of *Rheb1fl/fl* and *Rheb1Δ/Δ* mice. (D-E) The number of LK+ cells cocultured with MSCs from *Rheb1fl/fl* and *Rheb1Δ/Δ* mice for 24 h after adding SCF inhibitor (0.5 mM). (F) The relative mRNA expression of selected genes in *Rheb1fl/fl* or *Rheb1Δ/Δ* neutrophils isolated from BM. (G) The relative mRNA expression of IL-6 in T cells, B cells and myeloid cells from *wt* mice. (H) The relative mRNA expression of IL-6 in MSCs from *Rheb1fl/fl* or *Rheb1Δ/Δ* mice. The data are presented as the mean ± SD, n=3.
